# Supplementary material
Source: PubMed Central journal article supplement (PMC7817200)
Supplement: pnas.2018078118.sapp.pdf [file pnas.2018078118.sapp.pdf]

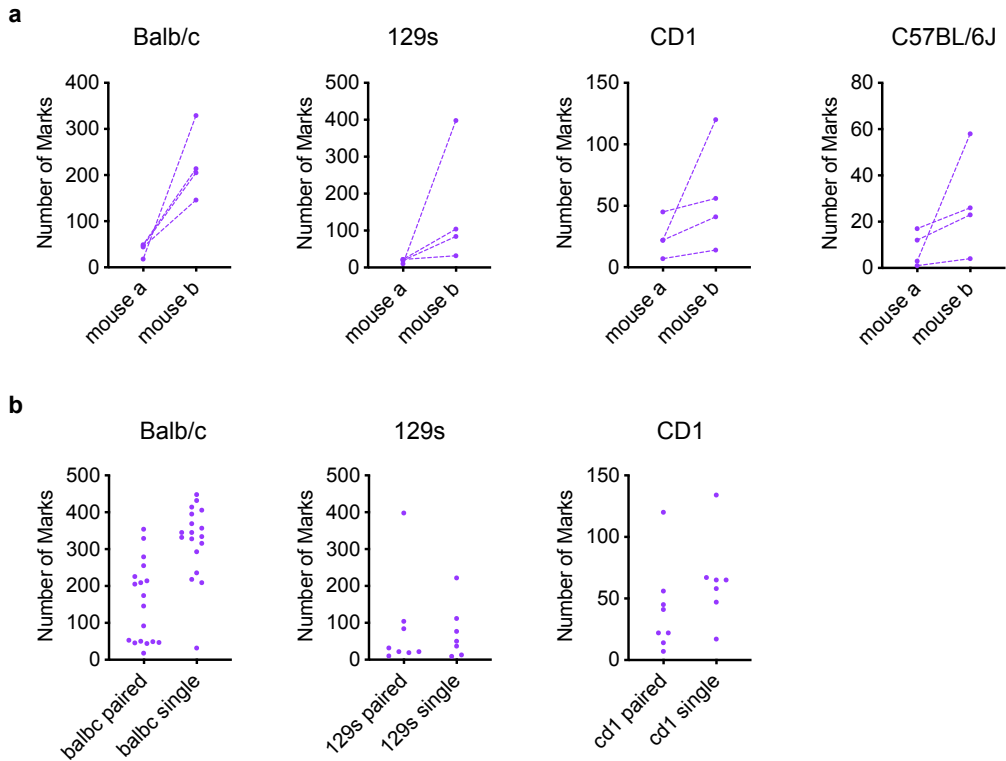

**Fig. S1. TCM in inbred laboratory strains.**

a) Comparison of micturition marks within pairs of male mice among 4 different laboratory strains. Mouse 'a' always denotes the partner with fewer micturition marks (n=8 mice per strain)

b) Comparison of micturition marks in paired and socially-isolated male mice among different strains after 1-hr TCM assay (n=8 pair-housed mice, n=7 socially-isolated mice).

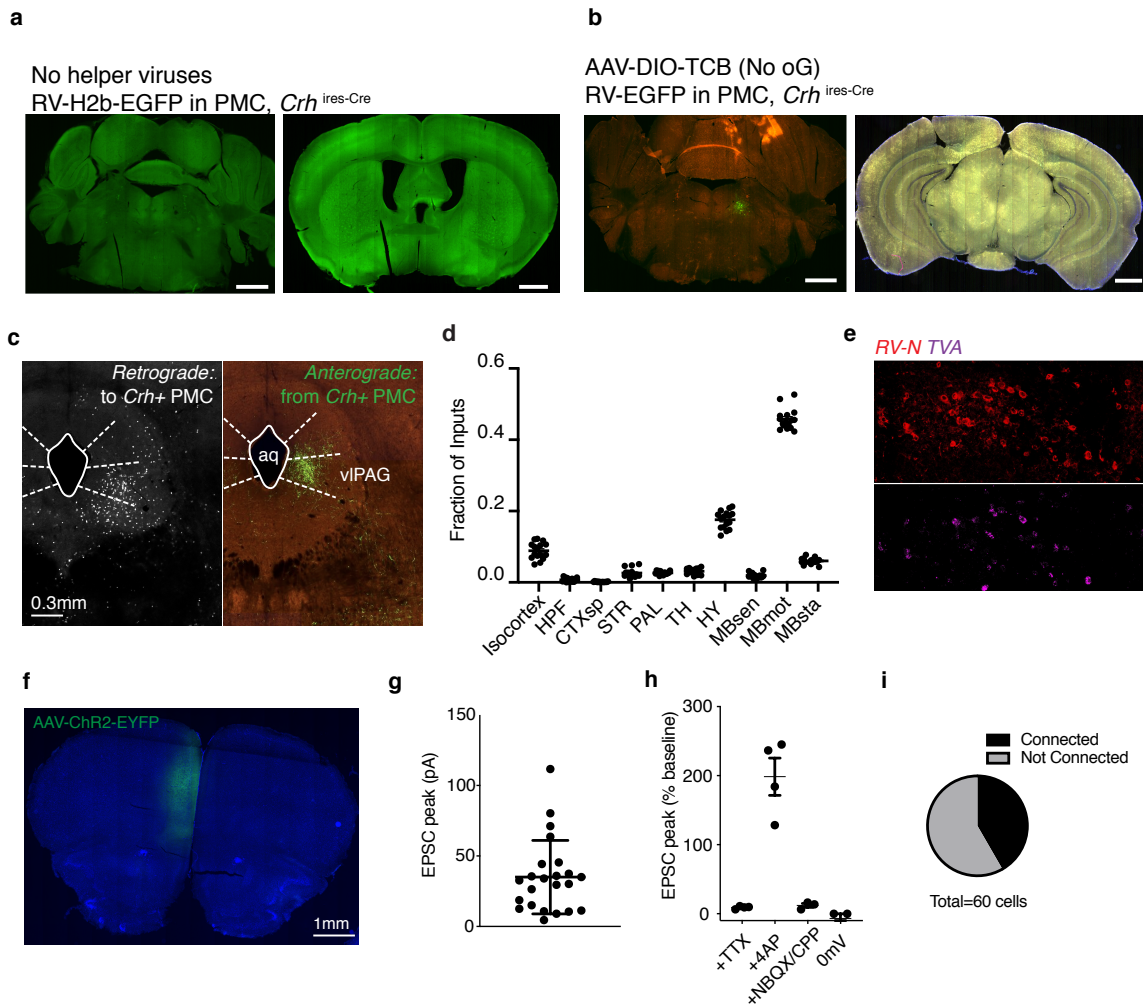

**Fig. S2. Supplementary materials for brain-wide rabies tracing.**

a) Helper virus injection was omitted, and RV-H2b-EGFP was injected into a *Crh*<sup>ires-Cre</sup> mouse. No EGFP+ cells were observed in or around the PMC (left). No long-range EGFP+ input cells were present in the forebrain (right).

b) AAV-DIO-RG was omitted from the helper AAV injection into a *Crh*<sup>ires-Cre</sup> mouse, and RbV-EGFP was subsequently injected. Starter cell infection was observed in PMC (right), but no long-range EGFP+ cells were observed in the forebrain (left). Scale bars: 1 mm.

c) PMC-PAG interconnectivity. Left: RV-h2b-EGFP labeled putative inputs to *Crh*+ PMC in ventrolateral periaqueductal grey (vIPAG). Right: Anterograde tracing from *Crh*+ PMC neurons (Allen Brain Institute) showing fibers from *Crh*+ PMC neurons in vIPAG.

d) Distributions of putative inputs to *Crh*+ PMC neurons throughout the whole brain.

e) *In situ* hybridization analysis of the PMC with *Rabies-N* mRNA (labels RV-infected cells) and *TVA* mRNA are visualized. *RV-N*+ but *TVA*- cells are putative local presynaptic neurons to *Crh*+ PMC starter neurons (*RV-N*+/*TVA*+).

f) A coronal section of showing AAV-ChR2-EYFP infection in mPFC (DAPI in blue).

g) Quantification of peak amplitudes of optogenetically-evoked excitatory postsynaptic currents (EPSC) recorded from *Crh*+ PMC neurons.

h) Quantification of optogenetically-evoked EPSC currents normalized to baseline pre-drug EPSC amplitudes after serial addition application of TTX, 4AP, and NBQX/CNQX or after depolarization to 0 mV. This demonstrates that the evoked currents are glutamatergic and mediated by direct release from ChR2-expressing axons.

i) Percentage of analyzed *Crh*+ PMC neurons that were responsive to optogenetic activation of mPFC inputs.

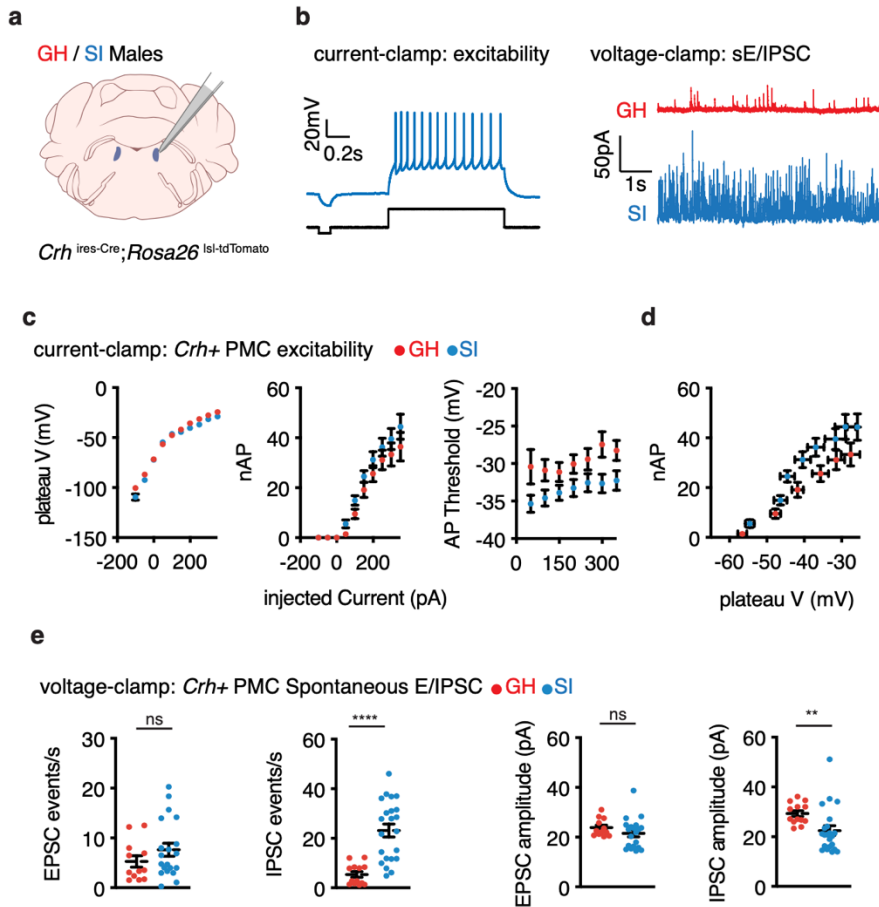

**Fig. S3. Social isolation induces synaptic changes at *Crh*+ PMC neurons.**

a) Schematic of whole-cell recordings configuration in acute brain slice containing PMC used to assess intrinsic excitability and synaptic changes in *Crh*+ PMC neurons.

b) Example traces of current-clamp and voltage-clamp recordings. (Left): Example trace of current-clamp recording (top) with the current injected (bottom). (Right): Example traces of spontaneous inhibitory post-synaptic currents (IPSC) in GH and SI males.

c) Plateau potential, number of action potentials, and first action potential threshold as a function of injected current (amplitude ranging from -200 to 400pA). Analysis method is described in Supplementary Fig. 4.

d) Comparisons of the numbers of action potentials and plateau potentials in *Crh*+ PMC neurons in GH (red) and SI (blue) mice (n=5 mice and 35 cells from GH males, 4 mice and 29 cells from SI males).

e) Frequencies and amplitudes of excitatory post-synaptic currents (EPSC) and IPSCs in *Crh*+ PMC neurons of GH and SI males (EPSC: n=4 animals 12 cells from GH males, n=5 animals 20 cells from SI males; IPSC: n=4 animals 13 cells from GH males, n=5 animals 22 cells from SI males; ns=not significant, \*\*\*\*P<0.0001, \*\*P<0.01; two-tailed Mann-Whitney *U* test).

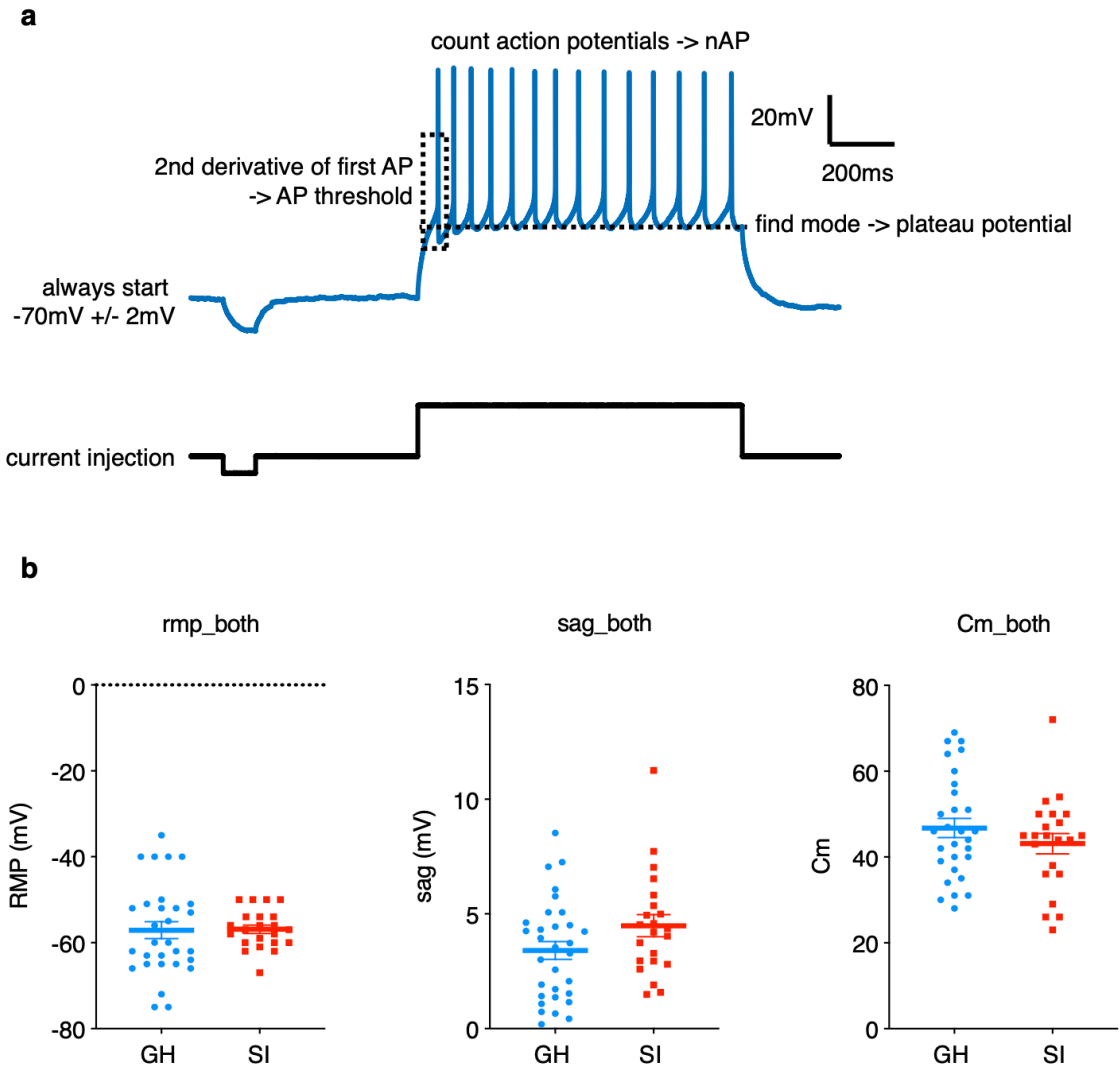

**Fig. S4. Analysis of current-clamp recordings of *Crh*+ PMC neurons and supplementary data.**

a) (top) Example current-clamp recording trace with brief description of analysis methods, and (bottom) corresponding current injection.

b) Resting membrane potential (RMP) (left), sag potential (middle), and membrane capacitance (right) in PMC *Crh*+ neurons from group-housed and socially-isolated males.

Region-based statistics:

● GH ● SI

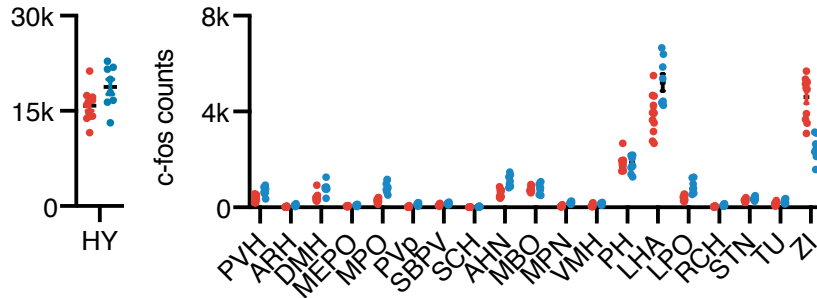

**Fig. S5. Supplementary materials for brain-wide Fos comparison between SI animals and GH animals.**

Fos immunolabeled cell counts in hypothalamus (HY) (left) and hypothalamic subregions (right).

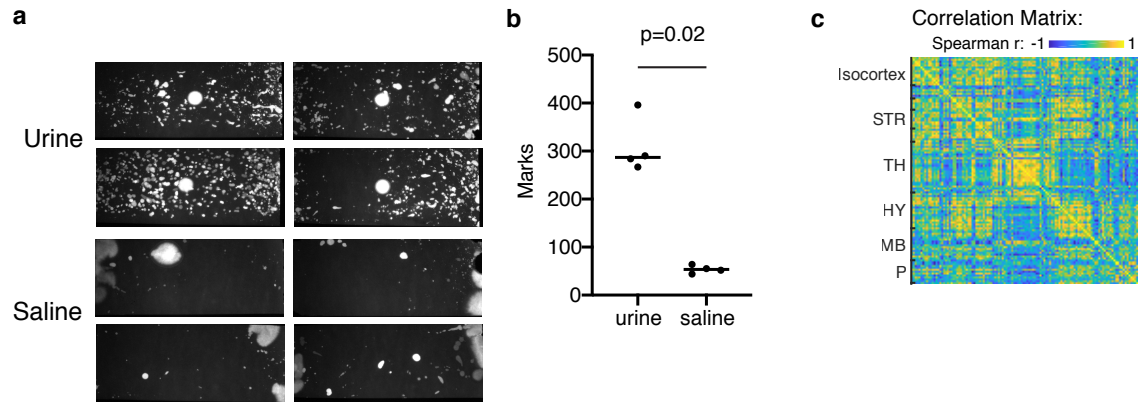

**Fig. S6. Supplementary materials for brain-wide Fos comparison between SI animals exposed to urine and saline.**

- a) TCM patterns from 4 urine- and 4 saline-exposed mice analyzed for Fos expression
- b) Quantification of urine spot numbers for the two groups ( $p=0.02$ , Mann-Whitney test).
- c) Across brain areas of correlations of Fos immunolabeling.

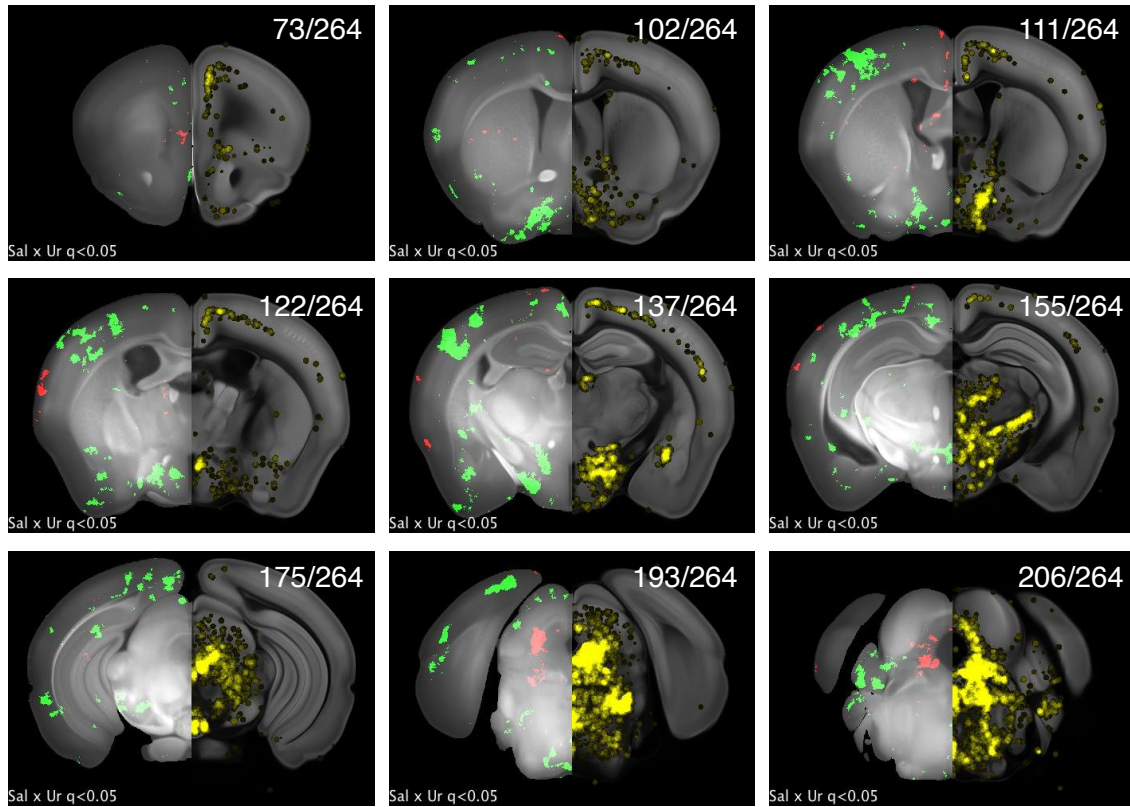

**Fig. S7. Interesting examples of the relationship between Fos activation and rabies labeling**

Statistical significance map of Fos iDisco+ data (left) and average voxelated maps of rabies inputs analyze by STPT (right) on the same coronal atlas based on ABA. Numbers at the top denote the coronal location within 264 coronal sections spanning the brain.



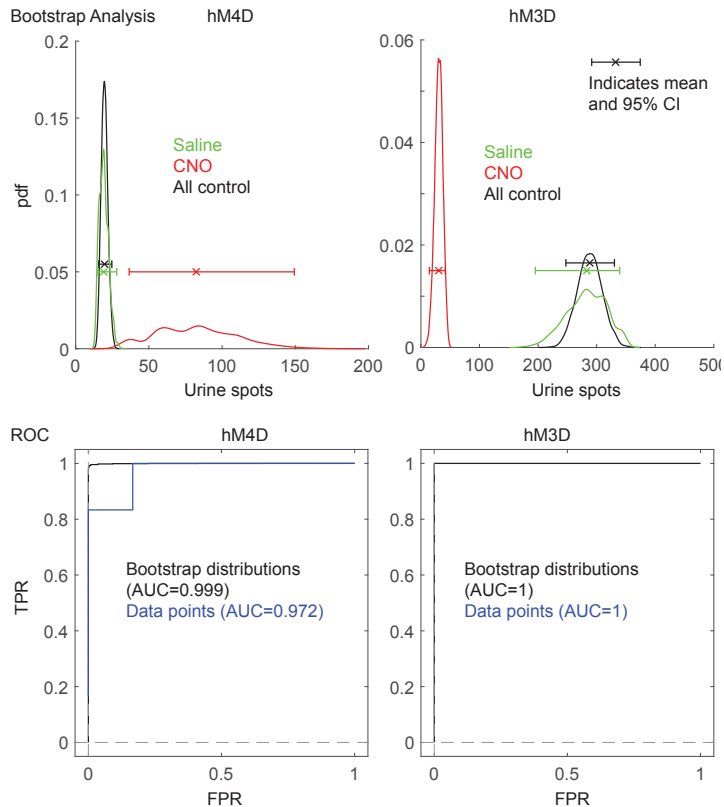

**Fig. S8. Bootstrap and ROC analysis of the data in Figure 5.**

*Top*, Distributions obtained from 10,000-fold sampling with replacement from the data obtained for CNO (CNO; red) and drug vehicle (Saline, green) treated (i.e. IP injection) mice. Data were used from mice that expressed hM4D (*left*; n=6 mice) or hM3D (*right*; n=6 mice) in LHA neurons. In addition, in each panel, the distribution resulting from bootstrap analyses of all the control data (All control; black) pooled from vehicle and CNO treated mice that expressed mCherry in LHA neurons and from vehicle treated mice expressed hM4D (*left*) or hM3D (*right*), as appropriate. For each distribution, the mean (X) and the 95% confidence intervals (horizontal lines) are shown.

*Bottom*, Receiver operator characteristics (ROC) analysis plotting true positive rate (TPR) vs. false positive rate (FPR) as a hypothetical threshold of number of urine spots is set and tested for its ability to distinguish data from CNO-treated animals from the associated control dataset. The curves obtained for analysis of the bootstrap distributions (black) and for comparison of only the actual data points (blue) are shown. On the right, the curves overlap and the blue line is hidden behind the black. The area under the curve (AUC) values are near the maximal possible value of 1.0 for each ROC analysis, indicating excellent discriminability of the groups based on this simple threshold model.

**Table S1. Abbreviations used to label brain regions**

| <b>Acronym</b> | <b>Name</b>                   |
|----------------|-------------------------------|
| FRP            | Frontal pole, cerebral cortex |
| MO             | Somatomotor areas             |
| SS             | Somatosensory areas           |
| ILA            | Infralimbic area              |
| GU             | Gustatory areas               |
| VISC           | Visceral area                 |
| AUD            | Auditory areas                |
| VIS            | Visual areas                  |
| ACA            | Anterior cingulate area       |
| PL             | Prelimbic area                |
| ORB            | Orbital area                  |
| AI             | Agranular insular area        |
| RSP            | Retrosplenial area            |
| TEa            | Temporal association areas    |
| PERI           | Perirhinal area               |
| ECT            | Ectorhinal area               |
| CA             | Ammon's horn                  |
| DG             | Dentate gyrus                 |
| ENT            | Entorhinal area               |
| PAR            | Parasubiculum                 |
| POST           | Postsubiculum                 |
| PRE            | Presubiculum                  |
| SUB            | Subiculum                     |
| CLA            | Clastrum                      |
| EP             | Endopiriform nucleus          |
| LA             | Lateral amygdalar nucleus     |
| BLA            | Basolateral amygdalar nucleus |
| BMA            | Basomedial amygdalar nucleus  |
| PA             | Posterior amygdalar nucleus   |
| CP             | Caudoputamen                  |
| ACB            | Nucleus accumbens             |
| FS             | Fundus of striatum            |
| OT             | Olfactory tubercle            |
| LS             | Lateral septal nucleus        |
| SF             | Septofimbrial nucleus         |
| AAA            | Anterior amygdalar area       |

|      |                                                  |
|------|--------------------------------------------------|
| CEA  | Central amygdalar nucleus                        |
| IA   | Intercalated amygdalar nucleus                   |
| MEA  | Medial amygdalar nucleus                         |
| GPe  | Globus pallidus, external segment                |
| GPI  | Globus pallidus, internal segment                |
| SI   | Substantia innominata                            |
| MA   | Magnocellular nucleus                            |
| MSC  | Medial septal complex                            |
| TRS  | Triangular nucleus of septum                     |
| BST  | Bed nuclei of the stria terminalis               |
| VAL  | Ventral anterior-lateral complex of the thalamus |
| VM   | Ventral medial nucleus of the thalamus           |
| VP   | Ventral posterior complex of the thalamus        |
| SPF  | Subparafascicular nucleus                        |
| MG   | Medial geniculate complex                        |
| LGd  | Dorsal part of the lateral geniculate complex    |
| LP   | Lateral posterior nucleus of the thalamus        |
| PO   | Posterior complex of the thalamus                |
| POL  | Posterior limiting nucleus of the thalamus       |
| AV   | Anteroventral nucleus of thalamus                |
| AM   | Anteromedial nucleus                             |
| AD   | Anterodorsal nucleus                             |
| LD   | Lateral dorsal nucleus of thalamus               |
| IMD  | Intermediodorsal nucleus of the thalamus         |
| MD   | Mediodorsal nucleus of thalamus                  |
| SMT  | Submedial nucleus of the thalamus                |
| PVT  | Paraventricular nucleus of the thalamus          |
| PT   | Parataenial nucleus                              |
| RE   | Nucleus of reunions                              |
| CM   | Central medial nucleus of the thalamus           |
| PCN  | Paracentral nucleus                              |
| CL   | Central lateral nucleus of the thalamus          |
| PF   | Parafascicular nucleus                           |
| RT   | Reticular nucleus of the thalamus                |
| LGv  | Ventral part of the lateral geniculate complex   |
| MH   | Medial habenula                                  |
| LH   | Lateral habenula                                 |
| PVH  | Paraventricular hypothalamic nucleus             |
| ARH  | Arcuate hypothalamic nucleus                     |
| DMH  | Dorsomedial nucleus of the hypothalamus          |
| MEPO | Median preoptic nucleus                          |

|      |                                                      |
|------|------------------------------------------------------|
| MPO  | Medial preoptic area                                 |
| PVp  | Periventricular hypothalamic nucleus, posterior part |
| SBPV | Subparaventricular zone                              |
| SCH  | Suprachiasmatic nucleus                              |
| AHN  | Anterior hypothalamic nucleus                        |
| MBO  | Mammillary body                                      |
| MPN  | Medial preoptic nucleus                              |
| VMH  | Ventromedial hypothalamic nucleus                    |
| PH   | Posterior hypothalamic nucleus                       |
| LHA  | Lateral hypothalamic area                            |
| LPO  | Lateral preoptic area                                |
| RCH  | Retrochiasmatic area                                 |
| STN  | Subthalamic nucleus                                  |
| TU   | Tuberal nucleus                                      |
| ZI   | Zona incerta                                         |
| SCs  | Superior colliculus, sensory related                 |
| IC   | Inferior colliculus                                  |
| SNr  | Substantia nigra, reticular part                     |
| VTA  | Ventral tegmental area                               |
| RR   | Midbrain reticular nucleus, retrorubral area         |
| MRN  | Midbrain reticular nucleus                           |
| SCm  | Superior colliculus, motor related                   |
| PAG  | Periaqueductal gray                                  |
| CUN  | Cuneiform nucleus                                    |
| RN   | Red nucleus                                          |
| SNc  | Substantia nigra, compact part                       |
| PPN  | Pedunculo pontine nucleus                            |
| RAmb | Midbrain raphé nuclei                                |
| NLL  | Nucleus of the lateral lemniscus                     |
| PSV  | Principal sensory nucleus of the trigeminal          |
| PB   | Parabrachial nucleus                                 |
| SOC  | Superior olivary complex                             |
| B    | Barrington's nucleus                                 |
| PCG  | Pontine central gray                                 |
| PG   | Pontine gray                                         |
| PRNc | Pontine reticular nucleus, caudal part               |
| SUT  | Supratrigeminal nucleus                              |
| TRN  | Tegmental reticular nucleus                          |
| V    | Motor nucleus of trigeminal                          |
| CS   | Superior central nucleus raphé                       |
| LC   | Locus ceruleus                                       |

|      |                                |
|------|--------------------------------|
| LDT  | Laterodorsal tegmental nucleus |
| NI   | Nucleus incertus               |
| PRNr | Pontine reticular nucleus      |

**Table S2. Summary region-based statistics from brain-wide distribution of putative inputs to *Crh*+ PMC neurons, normalized by total number of forebrain RV+ input cells (n=6 mice for GH-male, n=4 mice for SI-male, n=6 mice for GH-Female. FDR=0.05 for q-value)**

| ROIs | GH-male mean | GH-female mean | SI-male mean | p (Male vs Female) | p (GH Male vs SI Male) | p (GH-Female vs SI-Male) | q (GH-Male vs GH-Female) | q (GH-Male vs SI-Male) | q (GH-Female vs SI-Male) |
|------|--------------|----------------|--------------|--------------------|------------------------|--------------------------|--------------------------|------------------------|--------------------------|
| FRP  | 0.0005       | 0.0005         | 0.0002       | 0.8182             | 0.0095                 | 0.3923                   | 1.0000                   | 0.6968                 | 0.9505                   |
| MO   | 0.0314       | 0.0382         | 0.0346       | 0.5887             | 0.9143                 | 0.7619                   | 1.0000                   | 1.0000                 | 1.0000                   |
| SS   | 0.0203       | 0.0202         | 0.0136       | 0.9372             | 0.2571                 | 0.1714                   | 1.0000                   | 0.8410                 | 0.8803                   |
| ILA  | 0.0035       | 0.0035         | 0.0019       | 0.9372             | 0.1714                 | 0.1714                   | 1.0000                   | 0.7643                 | 0.8803                   |
| GU   | 0.0012       | 0.0013         | 0.0015       | 0.6991             | 1.0000                 | 0.7619                   | 1.0000                   | 1.0000                 | 1.0000                   |
| VISC | 0.0006       | 0.0005         | 0.0011       | 0.4848             | 0.7619                 | 0.9143                   | 1.0000                   | 0.9962                 | 1.0000                   |
| AUD  | 0.0035       | 0.0033         | 0.0024       | 0.8182             | 0.3524                 | 0.3524                   | 1.0000                   | 0.8602                 | 0.8803                   |
| VIS  | 0.0048       | 0.0051         | 0.0034       | 0.8182             | 0.3524                 | 0.2571                   | 1.0000                   | 0.8602                 | 0.8803                   |
| ACA  | 0.0109       | 0.0110         | 0.0068       | 0.9372             | 0.3524                 | 0.1714                   | 1.0000                   | 0.8602                 | 0.8803                   |
| PL   | 0.0028       | 0.0025         | 0.0018       | 0.8182             | 0.0667                 | 0.3524                   | 1.0000                   | 0.6968                 | 0.8803                   |
| ORB  | 0.0082       | 0.0085         | 0.0068       | 0.8182             | 0.7619                 | 0.3524                   | 1.0000                   | 0.9962                 | 0.8803                   |
| AI   | 0.0024       | 0.0025         | 0.0029       | 0.9372             | 0.7619                 | 0.7619                   | 1.0000                   | 0.9962                 | 1.0000                   |
| RSP  | 0.0085       | 0.0096         | 0.0085       | 0.8182             | 0.3524                 | 0.2571                   | 1.0000                   | 0.8602                 | 0.8803                   |
| TEa  | 0.0012       | 0.0012         | 0.0013       | 0.6991             | 0.6095                 | 0.9143                   | 1.0000                   | 0.9521                 | 1.0000                   |
| PERI | 0.0006       | 0.0005         | 0.0008       | 0.3939             | 0.6095                 | 0.4762                   | 1.0000                   | 0.9521                 | 1.0000                   |
| ECT  | 0.0010       | 0.0011         | 0.0016       | 0.8182             | 0.7619                 | 1.0000                   | 1.0000                   | 0.9962                 | 1.0000                   |
| CA   | 0.0015       | 0.0008         | 0.0004       | 0.3095             | 0.0667                 | 0.3524                   | 1.0000                   | 0.6968                 | 0.8803                   |
| DG   | 0.0025       | 0.0012         | 0.0006       | 0.1320             | 0.0190                 | 0.1714                   | 1.0000                   | 0.6968                 | 0.8803                   |
| ENT  | 0.0026       | 0.0022         | 0.0021       | 0.9372             | 0.3524                 | 0.7619                   | 1.0000                   | 0.8602                 | 1.0000                   |
| PAR  | 0.0003       | 0.0003         | 0.0000       | 0.6991             | 0.0114                 | 0.0307                   | 1.0000                   | 0.6968                 | 0.8803                   |
| POST | 0.0003       | 0.0001         | 0.0001       | 0.0931             | 0.0666                 | 0.2714                   | 1.0000                   | 0.6968                 | 0.8803                   |
| PRE  | 0.0002       | 0.0002         | 0.0000       | 0.6868             | 0.0477                 | 0.1393                   | 1.0000                   | 0.6968                 | 0.8803                   |
| SUB  | 0.0010       | 0.0006         | 0.0002       | 0.4848             | 0.0381                 | 0.0190                   | 1.0000                   | 0.6968                 | 0.8803                   |
| CLA  | 0.0007       | 0.0009         | 0.0007       | 0.5887             | 1.0000                 | 0.6095                   | 1.0000                   | 1.0000                 | 1.0000                   |
| EP   | 0.0001       | 0.0003         | 0.0005       | 0.0649             | 0.2571                 | 0.7619                   | 1.0000                   | 0.8410                 | 1.0000                   |
| LA   | 0.0001       | 0.0001         | 0.0000       | 0.8089             | 0.1236                 | 0.2110                   | 1.0000                   | 0.7487                 | 0.8803                   |
| BLA  | 0.0001       | 0.0002         | 0.0001       | 0.9372             | 0.2352                 | 0.2714                   | 1.0000                   | 0.8410                 | 0.8803                   |
| BMA  | 0.0001       | 0.0002         | 0.0002       | 0.2539             | 1.0000                 | 0.5895                   | 1.0000                   | 1.0000                 | 1.0000                   |
| PA   | 0.0000       | 0.0000         | 0.0000       | 0.4460             | 0.1491                 | 0.5403                   | 1.0000                   | 0.7643                 | 1.0000                   |
| CP   | 0.0038       | 0.0050         | 0.0023       | 0.5887             | 0.2571                 | 0.1714                   | 1.0000                   | 0.8410                 | 0.8803                   |
| ACB  | 0.0015       | 0.0015         | 0.0012       | 0.9372             | 0.7619                 | 0.2571                   | 1.0000                   | 0.9962                 | 0.8803                   |
| FS   | 0.0003       | 0.0003         | 0.0006       | 0.9372             | 0.0381                 | 0.0381                   | 1.0000                   | 0.6968                 | 0.8803                   |
| OT   | 0.0014       | 0.0012         | 0.0005       | 0.5887             | 0.0190                 | 0.3524                   | 1.0000                   | 0.6968                 | 0.8803                   |
| LS   | 0.0011       | 0.0019         | 0.0003       | 0.8182             | 0.0422                 | 0.0422                   | 1.0000                   | 0.6968                 | 0.8803                   |

|     |        |        |        |        |        |        |        |        |        |
|-----|--------|--------|--------|--------|--------|--------|--------|--------|--------|
| SF  | 0.0001 | 0.0001 | 0.0000 | 0.6868 | 0.5824 | 0.3314 | 1.0000 | 0.9521 | 0.8803 |
| AAA | 0.0008 | 0.0008 | 0.0008 | 0.8182 | 0.7619 | 0.9143 | 1.0000 | 0.9962 | 1.0000 |
| CEA | 0.0145 | 0.0163 | 0.0190 | 0.5887 | 0.4762 | 0.7619 | 1.0000 | 0.9349 | 1.0000 |
| IA  | 0.0000 | 0.0000 | 0.0000 | 0.4942 | 0.4712 | 0.8102 | 1.0000 | 0.9349 | 1.0000 |
| MEA | 0.0008 | 0.0007 | 0.0011 | 0.6991 | 1.0000 | 1.0000 | 1.0000 | 1.0000 | 1.0000 |
| GPe | 0.0005 | 0.0005 | 0.0005 | 0.6991 | 1.0000 | 0.9143 | 1.0000 | 1.0000 | 1.0000 |
| GPi | 0.0001 | 0.0002 | 0.0002 | 0.0904 | 0.2352 | 1.0000 | 1.0000 | 0.8410 | 1.0000 |
| SI  | 0.0051 | 0.0051 | 0.0059 | 0.9372 | 0.1143 | 0.1714 | 1.0000 | 0.7411 | 0.8803 |
| MA  | 0.0008 | 0.0010 | 0.0011 | 0.2403 | 0.1143 | 0.2571 | 1.0000 | 0.7411 | 0.8803 |
| MSC | 0.0020 | 0.0028 | 0.0018 | 0.3939 | 0.7619 | 0.2571 | 1.0000 | 0.9962 | 0.8803 |
| TRS | 0.0001 | 0.0001 | 0.0000 | 0.8182 | 0.0477 | 0.0131 | 1.0000 | 0.6968 | 0.8803 |
| BST | 0.0197 | 0.0191 | 0.0186 | 0.9372 | 0.9143 | 0.9143 | 1.0000 | 1.0000 | 1.0000 |
| VAL | 0.0001 | 0.0001 | 0.0002 | 0.8705 | 0.4500 | 0.3524 | 1.0000 | 0.9349 | 0.8803 |
| VM  | 0.0033 | 0.0034 | 0.0029 | 0.9372 | 0.7619 | 0.3524 | 1.0000 | 0.9962 | 0.8803 |
| VP  | 0.0003 | 0.0007 | 0.0004 | 0.1275 | 0.4542 | 0.2571 | 1.0000 | 0.9349 | 0.8803 |
| SPF | 0.0011 | 0.0010 | 0.0013 | 0.8182 | 0.7619 | 0.6095 | 1.0000 | 0.9962 | 1.0000 |
| MG  | 0.0001 | 0.0001 | 0.0001 | 1.0000 | 1.0000 | 0.9143 | 1.0000 | 1.0000 | 1.0000 |
| LGd | 0.0000 | 0.0000 | 0.0000 | 0.4047 | 0.5403 | 1.0000 | 1.0000 | 0.9521 | 1.0000 |
| LP  | 0.0001 | 0.0001 | 0.0000 | 0.7483 | 0.0307 | 0.0307 | 1.0000 | 0.6968 | 0.8803 |
| PO  | 0.0003 | 0.0004 | 0.0002 | 0.8182 | 0.1714 | 0.1714 | 1.0000 | 0.7643 | 0.8803 |
| POL | 0.0002 | 0.0002 | 0.0002 | 0.9372 | 0.7619 | 0.6095 | 1.0000 | 0.9962 | 1.0000 |
| AV  | 0.0000 | 0.0000 | 0.0000 | 1.0000 | 1.0000 | 1.0000 | 1.0000 | 1.0000 | 1.0000 |
| AM  | 0.0001 | 0.0000 | 0.0000 | 0.4620 | 0.6940 | 1.0000 | 1.0000 | 0.9962 | 1.0000 |
| AD  | 0.0000 | 0.0000 | 0.0000 | 0.4047 | 0.5120 | 0.0942 | 1.0000 | 0.9521 | 0.8803 |
| LD  | 0.0000 | 0.0000 | 0.0001 | 0.9289 | 0.5482 | 0.5696 | 1.0000 | 0.9521 | 1.0000 |
| IMD | 0.0003 | 0.0002 | 0.0002 | 0.8182 | 0.6689 | 0.6095 | 1.0000 | 0.9962 | 1.0000 |
| MD  | 0.0002 | 0.0001 | 0.0004 | 0.1994 | 0.1143 | 0.1143 | 1.0000 | 0.7411 | 0.8803 |
| SMT | 0.0000 | 0.0000 | 0.0000 | 0.4047 | 1.0000 | 0.5403 | 1.0000 | 1.0000 | 1.0000 |
| PVT | 0.0009 | 0.0009 | 0.0008 | 0.9372 | 1.0000 | 1.0000 | 1.0000 | 1.0000 | 1.0000 |
| PT  | 0.0000 | 0.0000 | 0.0000 | 1.0000 | 0.7609 | 0.7609 | 1.0000 | 0.9962 | 1.0000 |
| RE  | 0.0003 | 0.0002 | 0.0003 | 0.3358 | 1.0000 | 0.9143 | 1.0000 | 1.0000 | 1.0000 |
| CM  | 0.0000 | 0.0001 | 0.0001 | 0.7750 | 0.5482 | 1.0000 | 1.0000 | 0.9521 | 1.0000 |
| PCN | 0.0000 | 0.0000 | 0.0000 | 0.4047 | 1.0000 | 0.5403 | 1.0000 | 1.0000 | 1.0000 |
| CL  | 0.0000 | 0.0000 | 0.0000 | 0.7526 | 0.7186 | 0.5120 | 1.0000 | 0.9962 | 1.0000 |
| PF  | 0.0015 | 0.0015 | 0.0015 | 0.9372 | 0.9143 | 1.0000 | 1.0000 | 1.0000 | 1.0000 |
| RT  | 0.0004 | 0.0003 | 0.0002 | 0.5887 | 0.9143 | 0.2571 | 1.0000 | 1.0000 | 0.8803 |
| LGv | 0.0006 | 0.0004 | 0.0005 | 0.5887 | 0.7619 | 0.9143 | 1.0000 | 0.9962 | 1.0000 |
| MH  | 0.0021 | 0.0021 | 0.0013 | 1.0000 | 0.2571 | 0.3524 | 1.0000 | 0.8410 | 0.8803 |
| LH  | 0.0082 | 0.0079 | 0.0081 | 0.8182 | 1.0000 | 1.0000 | 1.0000 | 1.0000 | 1.0000 |
| PVH | 0.0035 | 0.0024 | 0.0032 | 0.3939 | 0.9143 | 0.6095 | 1.0000 | 1.0000 | 1.0000 |
| ARH | 0.0025 | 0.0017 | 0.0013 | 0.1797 | 0.0667 | 0.6095 | 1.0000 | 0.6968 | 1.0000 |

|     |        |        |        |        |        |        |        |        |        |
|-----|--------|--------|--------|--------|--------|--------|--------|--------|--------|
| DMH | 0.0122 | 0.0104 | 0.0088 | 0.3095 | 0.1143 | 0.4762 | 1.0000 | 0.7411 | 1.0000 |
| MEP |        |        |        |        |        |        |        |        |        |
| O   | 0.0013 | 0.0012 | 0.0008 | 0.8182 | 0.3524 | 0.1714 | 1.0000 | 0.8602 | 0.8803 |
| MPO | 0.0091 | 0.0093 | 0.0069 | 0.9372 | 0.2571 | 0.2571 | 1.0000 | 0.8410 | 0.8803 |
| PVp | 0.0009 | 0.0012 | 0.0005 | 0.4848 | 0.0667 | 0.0381 | 1.0000 | 0.6968 | 0.8803 |
| SBP |        |        |        |        |        |        |        |        |        |
| V   | 0.0013 | 0.0014 | 0.0013 | 0.8182 | 1.0000 | 0.9143 | 1.0000 | 1.0000 | 1.0000 |
| SCH | 0.0000 | 0.0002 | 0.0000 | 0.1581 | 0.6940 | 0.1236 | 1.0000 | 0.9962 | 0.8803 |
| AHN | 0.0021 | 0.0020 | 0.0021 | 0.6991 | 1.0000 | 0.9143 | 1.0000 | 1.0000 | 1.0000 |
| MBO | 0.0056 | 0.0056 | 0.0044 | 0.8182 | 0.1714 | 0.4762 | 1.0000 | 0.7643 | 1.0000 |
| MPN | 0.0016 | 0.0023 | 0.0021 | 0.3095 | 0.6095 | 0.9143 | 1.0000 | 0.9521 | 1.0000 |
| VMH | 0.0025 | 0.0014 | 0.0020 | 0.0931 | 0.9143 | 0.2571 | 1.0000 | 1.0000 | 0.8803 |
| PH  | 0.0244 | 0.0207 | 0.0211 | 0.3939 | 0.6095 | 0.9143 | 1.0000 | 0.9521 | 1.0000 |
| LHA | 0.0608 | 0.0544 | 0.0533 | 0.3939 | 0.2571 | 0.7619 | 1.0000 | 0.8410 | 1.0000 |
| LPO | 0.0066 | 0.0060 | 0.0069 | 0.8182 | 0.9143 | 0.6095 | 1.0000 | 1.0000 | 1.0000 |
| RCH | 0.0005 | 0.0005 | 0.0002 | 1.0000 | 0.2850 | 0.2571 | 1.0000 | 0.8410 | 0.8803 |
| STN | 0.0018 | 0.0016 | 0.0023 | 0.8182 | 0.2571 | 0.1714 | 1.0000 | 0.8410 | 0.8803 |
| TU  | 0.0030 | 0.0020 | 0.0017 | 0.3939 | 0.2571 | 0.7619 | 1.0000 | 0.8410 | 1.0000 |
| ZI  | 0.0296 | 0.0320 | 0.0343 | 0.8182 | 0.4762 | 1.0000 | 1.0000 | 0.9349 | 1.0000 |
| SCs | 0.0009 | 0.0007 | 0.0009 | 0.8182 | 1.0000 | 0.9143 | 1.0000 | 1.0000 | 1.0000 |
| IC  | 0.0075 | 0.0094 | 0.0124 | 0.6991 | 1.0000 | 0.9143 | 1.0000 | 1.0000 | 1.0000 |
| SNr | 0.0076 | 0.0080 | 0.0132 | 0.8182 | 0.1143 | 0.0667 | 1.0000 | 0.7411 | 0.8803 |
| VTA | 0.0092 | 0.0091 | 0.0106 | 1.0000 | 0.2571 | 0.1143 | 1.0000 | 0.8410 | 0.8803 |
| RR  | 0.0123 | 0.0116 | 0.0177 | 0.9372 | 0.1143 | 0.0381 | 1.0000 | 0.7411 | 0.8803 |
| MRN | 0.0823 | 0.0936 | 0.1053 | 0.1797 | 0.0095 | 0.1714 | 1.0000 | 0.6968 | 0.8803 |
| SCm | 0.0519 | 0.0645 | 0.0650 | 0.3939 | 0.0381 | 0.7619 | 1.0000 | 0.6968 | 1.0000 |
| PAG | 0.2544 | 0.2350 | 0.2466 | 0.3095 | 0.9143 | 0.4762 | 1.0000 | 1.0000 | 1.0000 |
| CUN | 0.0041 | 0.0040 | 0.0040 | 0.8182 | 0.7619 | 1.0000 | 1.0000 | 0.9962 | 1.0000 |
| RN  | 0.0013 | 0.0028 | 0.0015 | 0.8182 | 0.7619 | 0.6095 | 1.0000 | 0.9962 | 1.0000 |
| SNc | 0.0044 | 0.0045 | 0.0074 | 0.9372 | 0.1714 | 0.1143 | 1.0000 | 0.7643 | 0.8803 |
| PPN | 0.0167 | 0.0168 | 0.0184 | 0.5887 | 0.6095 | 0.3524 | 1.0000 | 0.9521 | 0.8803 |
| RAm |        |        |        |        |        |        |        |        |        |
| b   | 0.0334 | 0.0360 | 0.0310 | 0.5887 | 0.7619 | 0.7619 | 1.0000 | 0.9962 | 1.0000 |



**Table S3. Summary region-based statistics from comparison of brain-wide Fos counts between socially-isolated and pair-housed males (n=8 for single-housed and n=11 for group-housed biologically independent samples. FDR=0.05 for q-value)**

| ROIs | mean.single | std.single | mean.pair  | std.pair   | p-value    | q-value    |
|------|-------------|------------|------------|------------|------------|------------|
| FRP  | 8           | 7.78276484 | 3.63636364 | 2.69342634 | 0.05167725 | 0.09867253 |
| MO   | 9474.5      | 2310.68734 | 2138.54545 | 606.273925 | 6.07E-34   | 2.80E-32   |
| SS   | 37380.125   | 9731.39041 | 9930.27273 | 2511.03346 | 2.79E-31   | 1.08E-29   |
| ILA  | 1508.125    | 374.516617 | 229.181818 | 228.420147 | 9.95E-10   | 3.99E-09   |
| GU   | 796.25      | 273.602814 | 193.363636 | 65.6205345 | 1.91E-20   | 2.31E-19   |
| VISC | 1879.625    | 445.7568   | 449.454545 | 210.895881 | 3.06E-17   | 2.62E-16   |
| AUD  | 25722.75    | 3659.13837 | 11576.3636 | 2015.48149 | 6.98E-30   | 2.09E-28   |
| VIS  | 51038       | 6992.74097 | 19436.2727 | 6396.2222  | 1.11E-16   | 8.93E-16   |
| ACA  | 3910.25     | 769.536363 | 1090.45455 | 346.650072 | 3.14E-28   | 8.35E-27   |
| PL   | 840         | 134.437452 | 63.2727273 | 50.3251248 | 6.49E-19   | 6.59E-18   |
| ORB  | 1019.875    | 335.884095 | 259.909091 | 122.861267 | 6.00E-13   | 3.16E-12   |
| AI   | 3308.5      | 1070.91896 | 900.363636 | 283.193317 | 1.41E-18   | 1.41E-17   |
| RSP  | 14287.25    | 2018.48527 | 5593.18182 | 1211.34304 | 2.37E-29   | 6.61E-28   |
| TEa  | 13003.125   | 2030.78313 | 6484.45455 | 1275.57739 | 5.84E-19   | 6.03E-18   |
| PERI | 4940.125    | 671.090677 | 3336.09091 | 625.697284 | 3.90E-07   | 1.23E-06   |
| ECT  | 13587.375   | 2101.77938 | 7439.81818 | 1423.85363 | 8.73E-15   | 5.63E-14   |
| CA   | 12968.75    | 1300.50372 | 9122.72727 | 741.27459  | 6.25E-19   | 6.40E-18   |
| DG   | 5504.875    | 565.877684 | 5507.27273 | 926.693271 | 0.99470159 | 1          |
| ENT  | 35314.375   | 4604.23212 | 22176.8182 | 1896.29775 | 5.52E-23   | 8.39E-22   |
| PAR  | 3847.875    | 732.782259 | 2509.72727 | 451.256488 | 1.64E-07   | 5.35E-07   |
| POST | 2674.75     | 305.771039 | 1732.63636 | 403.768566 | 3.19E-07   | 1.01E-06   |
| PRE  | 4836.375    | 513.651894 | 3205       | 333.433652 | 9.41E-19   | 9.48E-18   |
| SUB  | 13467.625   | 1167.36112 | 8723.18182 | 802.483373 | 9.68E-27   | 2.11E-25   |
| CLA  | 1719.5      | 190.115003 | 631.727273 | 184.832406 | 3.36E-21   | 4.49E-20   |
| EP   | 4412.125    | 766.91412  | 2492.90909 | 390.688995 | 1.72E-14   | 1.06E-13   |
| LA   | 823         | 409.0358   | 529.636364 | 206.877874 | 0.01471798 | 0.02990993 |
| BLA  | 2936.625    | 524.318861 | 1874.36364 | 624.916838 | 0.00011272 | 0.00027983 |
| BMA  | 2534.625    | 501.47324  | 1289.27273 | 247.252539 | 1.76E-14   | 1.07E-13   |
| PA   | 683.625     | 96.6376701 | 429.545455 | 112.034248 | 2.01E-06   | 5.89E-06   |
| CP   | 9276.875    | 1485.62824 | 6820.27273 | 1293.6304  | 9.33E-05   | 0.00023359 |
| ACB  | 1781.5      | 401.607129 | 705.818182 | 232.304033 | 3.55E-13   | 1.92E-12   |
| FS   | 231.625     | 52.5627176 | 129        | 77.9102047 | 0.00113381 | 0.00261933 |
| OT   | 979.125     | 231.175529 | 201.909091 | 95.0373132 | 3.44E-19   | 3.72E-18   |
| LS   | 2439.625    | 987.57422  | 816.727273 | 268.756057 | 6.60E-11   | 2.93E-10   |
| SF   | 582.25      | 364.854864 | 409        | 221.142036 | 0.38191238 | 0.627278   |

|     |          |            |            |            |            |            |
|-----|----------|------------|------------|------------|------------|------------|
| AAA | 749      | 241.240248 | 368.636364 | 98.5629471 | 9.00E-08   | 3.01E-07   |
| CEA | 1434.5   | 276.400331 | 853.363636 | 454.129117 | 0.00078435 | 0.00183678 |
| IA  | 472.125  | 88.2778689 | 219.272727 | 63.909453  | 4.62E-12   | 2.24E-11   |
| MEA | 2769.375 | 526.617763 | 1497.18182 | 399.15406  | 7.74E-09   | 2.85E-08   |
| GPe | 320.625  | 61.2394306 | 506        | 139.293934 | 2.31E-05   | 6.08E-05   |
| GPi | 97.5     | 23.4520788 | 262.363636 | 101.607355 | 3.94E-08   | 1.36E-07   |
| SI  | 972.25   | 236.076713 | 607.363636 | 120.939053 | 1.35E-06   | 4.05E-06   |
| MA  | 151.75   | 99.7836946 | 83         | 36.1718122 | 0.01405278 | 0.02860658 |
| MSC | 706.75   | 203.457788 | 330.909091 | 73.9911543 | 4.32E-12   | 2.11E-11   |
| TRS | 208.5    | 157.024111 | 165.545455 | 96.9859409 | 0.56032455 | 0.88166553 |
| BST | 1777.5   | 588.570908 | 643.272727 | 161.744299 | 1.45E-14   | 9.08E-14   |
| VAL | 153      | 142.652425 | 435.181818 | 209.302087 | 0.00121085 | 0.00278125 |
| VM  | 272.5    | 94.1123948 | 406.454545 | 104.327718 | 0.00284802 | 0.00622967 |
| VP  | 180.875  | 143.047882 | 2103       | 755.4727   | 1.49E-23   | 2.56E-22   |
| SPF | 516.625  | 102.611525 | 678.363636 | 92.1089276 | 8.99E-05   | 0.00022637 |
| MG  | 787.125  | 266.58284  | 684.909091 | 167.700599 | 0.24454795 | 0.41947496 |
| LGd | 79.125   | 78.4409469 | 362.727273 | 133.032395 | 7.37E-10   | 2.97E-09   |
| LP  | 338.875  | 306.076292 | 326.181818 | 77.4181092 | 0.86473098 | 1          |
| PO  | 155.75   | 188.54916  | 404.818182 | 123.316518 | 0.00056425 | 0.0013344  |
| POL | 120.375  | 33.1961164 | 227.181818 | 39.7764206 | 1.11E-11   | 5.13E-11   |
| AV  | 522.125  | 470.06639  | 277.272727 | 182.168653 | 0.07972087 | 0.14773619 |
| AM  | 674.5    | 413.222873 | 278.636364 | 104.290242 | 0.00018877 | 0.00046381 |
| AD  | 216.5    | 153.216933 | 123.818182 | 57.3982895 | 0.07140528 | 0.13273632 |
| LD  | 148.625  | 83.4333566 | 297.818182 | 68.5285607 | 0.00023616 | 0.00057552 |
| IMD | 306      | 125.434103 | 260.181818 | 132.393971 | 0.45142635 | 0.7334149  |
| MD  | 773      | 332.059805 | 663.545455 | 250.826778 | 0.4549281  | 0.73713482 |
| SMT | 31       | 25.3940375 | 29.8181818 | 10.1766221 | 0.87901879 | 1          |
| PVT | 2249.75  | 647.642924 | 1957.18182 | 667.246404 | 0.40805965 | 0.66748093 |
| PT  | 521.625  | 205.16261  | 372.727273 | 121.59037  | 0.05233662 | 0.09960574 |
| RE  | 1361.5   | 517.744283 | 1195.09091 | 220.106999 | 0.33289763 | 0.55359815 |
| CM  | 447.375  | 115.881636 | 328.090909 | 55.9490028 | 0.00109979 | 0.00255057 |
| PCN | 55.625   | 35.7648571 | 37.4545455 | 10.6991928 | 0.06795918 | 0.12688431 |
| CL  | 149.25   | 82.5915077 | 86.4545455 | 52.236699  | 0.04255162 | 0.0828237  |
| PF  | 318.375  | 179.288226 | 270        | 167.512388 | 0.53914667 | 0.85281907 |
| RT  | 466      | 175.730313 | 3061.63636 | 1065.49935 | 1.37E-27   | 3.35E-26   |
| LGv | 678.875  | 112.583223 | 864.090909 | 220.432055 | 0.01785526 | 0.03586006 |
| MH  | 122      | 45.9409559 | 200.818182 | 121.505406 | 0.0317276  | 0.06267117 |
| LH  | 267.75   | 103.673595 | 293        | 116.779279 | 0.63173157 | 0.9836963  |
| PVH | 694.75   | 188.081859 | 370.636364 | 129.540938 | 2.07E-05   | 5.48E-05   |

|      |          |            |            |            |            |            |
|------|----------|------------|------------|------------|------------|------------|
| ARH  | 93.375   | 36.1027799 | 17.6363636 | 17.4371599 | 2.27E-06   | 6.63E-06   |
| DMH  | 807.75   | 236.467908 | 427.272727 | 178.9425   | 1.83E-05   | 4.86E-05   |
| MEPO | 81.375   | 29.2522893 | 51.1818182 | 13.429953  | 0.00207436 | 0.00462297 |
| MPO  | 849.75   | 232.656553 | 283.454545 | 94.7241929 | 1.16E-14   | 7.37E-14   |
| PVp  | 130.125  | 54.9634619 | 28.9090909 | 21.9975205 | 1.77E-06   | 5.24E-06   |
| SBPV | 160      | 37.6221819 | 98.4545455 | 35.4185365 | 0.00039098 | 0.00093571 |
| SCH  | 27.125   | 11.3821602 | 12.1818182 | 8.65815433 | 0.00574439 | 0.01212593 |
| AHN  | 1094     | 245.908229 | 590.727273 | 159.854991 | 2.74E-08   | 9.61E-08   |
| MBO  | 805.25   | 216.305175 | 757.545455 | 110.760429 | 0.51172074 | 0.81698157 |
| MPN  | 198.5    | 45.033321  | 51.4545455 | 25.8703059 | 5.95E-16   | 4.46E-15   |
| VMH  | 153.875  | 38.8529738 | 76.8181818 | 54.2158984 | 0.00247327 | 0.00546123 |
| PH   | 1769.25  | 339.613962 | 1866.72727 | 311.243342 | 0.4837325  | 0.7743595  |
| LHA  | 5209.625 | 1000.09841 | 3886.90909 | 857.446494 | 0.00140149 | 0.00318858 |
| LPO  | 848.125  | 283.128662 | 404.545455 | 109.755513 | 2.10E-08   | 7.47E-08   |
| RCH  | 86.25    | 35.2328986 | 32.4545455 | 16.0210089 | 3.64E-06   | 1.03E-05   |
| STN  | 367.5    | 74.8484182 | 298.363636 | 56.6926322 | 0.01478468 | 0.02999463 |
| TU   | 252.75   | 84.076071  | 147.909091 | 68.1049991 | 0.00417905 | 0.00897972 |
| ZI   | 2455.625 | 511.563133 | 4609.18182 | 886.261115 | 4.51E-12   | 2.19E-11   |
| SCs  | 4945.75  | 1160.32209 | 3745.09091 | 1042.10983 | 0.01394329 | 0.02843199 |
| IC   | 7683.375 | 1588.1039  | 7350.45455 | 1501.29087 | 0.62202223 | 0.96983701 |
| SNr  | 1111.375 | 592.97746  | 1656.18182 | 329.724375 | 0.00931997 | 0.01920042 |
| VTA  | 1038.625 | 316.671952 | 1671.45455 | 246.471647 | 1.33E-06   | 3.99E-06   |
| RR   | 949.75   | 331.713624 | 1543.18182 | 206.262851 | 2.83E-06   | 8.16E-06   |
| MRN  | 5083.875 | 1520.67142 | 16277.7273 | 1487.87379 | 7.36E-42   | 5.52E-40   |
| SCm  | 7913.375 | 1250.74617 | 9225.18182 | 1469.88318 | 0.0325595  | 0.06420863 |
| PAG  | 4731     | 957.865782 | 4070.09091 | 1101.48095 | 0.13674879 | 0.24401484 |
| CUN  | 209.25   | 59.4564667 | 298.727273 | 148.495179 | 0.02834945 | 0.05609075 |
| RN   | 176.5    | 55.3224315 | 1420.18182 | 113.062654 | 1.12E-130  | 2.70E-128  |
| SNc  | 466.375  | 167.249119 | 833.818182 | 183.825362 | 8.98E-07   | 2.73E-06   |
| PPN  | 550.375  | 130.480363 | 1371.36364 | 215.255324 | 2.26E-25   | 4.44E-24   |
| RAmb | 929.375  | 173.095298 | 1344.45455 | 296.684467 | 2.42E-05   | 6.31E-05   |
| NLL  | 827.5    | 185.683294 | 1539.90909 | 500.970948 | 1.50E-07   | 4.94E-07   |
| PSV  | 555.375  | 73.7077966 | 1395.81818 | 630.354633 | 2.67E-10   | 1.11E-09   |
| PB   | 719.625  | 218.480426 | 1301.36364 | 859.319297 | 0.00248172 | 0.00546982 |
| SOC  | 380.625  | 92.0418189 | 400.545455 | 99.8442423 | 0.63872424 | 0.99329489 |
| B    | 52.125   | 29.4833488 | 41.2727273 | 29.6347462 | 0.46034846 | 0.74387844 |
| PCG  | 822      | 349.111935 | 1056.18182 | 485.823799 | 0.18381363 | 0.32080428 |
| PG   | 3173.5   | 404.568906 | 2755.54545 | 405.212627 | 0.02226692 | 0.04442269 |
| PRNc | 1156.375 | 264.718685 | 4369.27273 | 2403.22779 | 4.39E-15   | 2.96E-14   |

|      |          |            |            |            |            |            |
|------|----------|------------|------------|------------|------------|------------|
| SUT  | 92.625   | 72.2356016 | 208.636364 | 168.71175  | 0.00517259 | 0.01101587 |
| TRN  | 2143.375 | 269.771828 | 2479.27273 | 643.581711 | 0.08842236 | 0.16260493 |
| V    | 194.875  | 70.5031661 | 606        | 398.200954 | 6.61E-08   | 2.23E-07   |
| CS   | 644.25   | 228.900946 | 1433       | 548.215104 | 7.22E-08   | 2.42E-07   |
| LC   | 81.375   | 34.0836681 | 65.7272727 | 35.4347031 | 0.3146108  | 0.52831701 |
| LDT  | 146.375  | 81.8394552 | 210.454545 | 163.707278 | 0.19968489 | 0.34698867 |
| NI   | 179.125  | 84.0415501 | 365.818182 | 204.640572 | 0.00149195 | 0.00338157 |
| PRNr | 2227.75  | 479.209692 | 7805.63636 | 1843.80543 | 2.34E-39   | 1.47E-37   |

**Table S4. Summary region-based statistics for comparison of brain-wide Fos counts for socially-isolated males exposed to urine vs. saline (n=4 biologically independent samples for each condition, FDR=0.05 for q-value)**

| ROIs | mean.saline | std.saline | mean.urine | std.urine  | p-value    | q-value    |
|------|-------------|------------|------------|------------|------------|------------|
| FRP  | 5.75        | 2.21735578 | 10.25      | 11.0867789 | 0.38635903 | 1          |
| MO   | 10151       | 2698.73612 | 8798       | 1988.64979 | 0.33405048 | 0.99386234 |
| SS   | 44241       | 7294.89995 | 30519.25   | 6498.20931 | 0.00252153 | 0.04651245 |
| ILA  | 1400.75     | 205.344223 | 1615.5     | 504.349416 | 0.34562616 | 1          |
| GU   | 859.75      | 312.097608 | 732.75     | 257.89969  | 0.49856546 | 1          |
| VISC | 1967.5      | 424.895673 | 1791.75    | 512.350385 | 0.5428334  | 1          |
| AUD  | 27404.5     | 2749.26687 | 24041      | 4017.60235 | 0.11740854 | 0.61472856 |
| VIS  | 54647       | 5387.75878 | 47429      | 7094.74223 | 0.0638999  | 0.45334898 |
| ACA  | 3911.25     | 155.160938 | 3909.25    | 1165.19966 | 0.99708351 | 1          |
| PL   | 870         | 161.517801 | 810        | 116.975781 | 0.47636564 | 1          |
| ORB  | 995.75      | 270.905119 | 1044       | 433.936247 | 0.82932072 | 1          |
| AI   | 3541.25     | 1088.7869  | 3075.75    | 1160.21848 | 0.51048768 | 1          |
| RSP  | 15636.5     | 672.227392 | 12938      | 2049.4313  | 0.00834069 | 0.10092931 |
| TEa  | 13874       | 2081.0901  | 12132.25   | 1808.16359 | 0.1449849  | 0.67771513 |
| PERI | 5259.75     | 476.1704   | 4620.5     | 742.752314 | 0.11651507 | 0.6141783  |
| ECT  | 14308.25    | 1221.11762 | 12866.5    | 2725.90444 | 0.28428824 | 0.90345558 |
| CA   | 13124.25    | 649.664721 | 12813.25   | 1860.06584 | 0.7178315  | 1          |
| DG   | 5379        | 571.415202 | 5630.75    | 615.147882 | 0.49673518 | 1          |
| ENT  | 36884.75    | 1427.92492 | 33744      | 6391.326   | 0.2736083  | 0.89145749 |
| PAR  | 3847.75     | 288.674413 | 3848       | 1081.47893 | 0.9996073  | 1          |
| POST | 2881        | 124.362374 | 2468.5     | 298.753522 | 0.00568034 | 0.08108003 |
| PRE  | 4709.75     | 516.269552 | 4963       | 553.472071 | 0.45081741 | 1          |
| SUB  | 14090.75    | 258.3865   | 12844.5    | 1441.35989 | 0.06676397 | 0.46540698 |
| CLA  | 1750.25     | 237.352586 | 1688.75    | 159.616989 | 0.62835086 | 1          |
| EP   | 4785        | 770.920662 | 4039.25    | 638.189823 | 0.09876051 | 0.56070126 |
| LA   | 1014.75     | 480.082198 | 631.25     | 248.72391  | 0.08923682 | 0.5270687  |
| BLA  | 3330.5      | 189.015872 | 2542.75    | 438.212563 | 0.00089385 | 0.02232759 |
| BMA  | 2842.25     | 270.991236 | 2227       | 510.866584 | 0.02881308 | 0.26018094 |
| PA   | 700         | 87.2505969 | 667.25     | 116.029809 | 0.61919883 | 1          |
| CP   | 10138.5     | 1121.0223  | 8415.25    | 1383.27929 | 0.02912966 | 0.26018094 |
| ACB  | 1900.5      | 493.296733 | 1662.5     | 308.601685 | 0.36618832 | 1          |
| FS   | 265.5       | 54.0709411 | 197.75     | 21.5154983 | 0.00374718 | 0.05933355 |
| OT   | 1174.75     | 104.87572  | 783.5      | 107.927445 | 8.41E-09   | 1.12E-06   |
| LS   | 2376.5      | 1211.51544 | 2502.75    | 892.922682 | 0.85183751 | 1          |
| SF   | 366.5       | 384.349234 | 798        | 196.872209 | 0.21687968 | 0.80839929 |

|     |         |            |         |            |            |            |
|-----|---------|------------|---------|------------|------------|------------|
| AAA | 910.25  | 185.465855 | 587.75  | 179.046316 | 0.00360848 | 0.05846712 |
| CEA | 1589.25 | 264.521423 | 1279.75 | 210.780099 | 0.03846833 | 0.3258291  |
| IA  | 512     | 54.4242593 | 432.25  | 104.79305  | 0.15304589 | 0.69656742 |
| MEA | 2974.75 | 481.770606 | 2564    | 550.013333 | 0.20177867 | 0.78295349 |
| GPe | 331.5   | 41.0731056 | 309.75  | 82.1477328 | 0.5755571  | 1          |
| GPi | 109.5   | 12.7148207 | 85.5    | 27.1600196 | 0.07224244 | 0.47507918 |
| SI  | 1146.5  | 199.782382 | 798     | 95.7113717 | 0.0001815  | 0.00805979 |
| MA  | 222.25  | 90.149413  | 81.25   | 43.0300283 | 0.00079467 | 0.02071317 |
| MSC | 836.25  | 201.769464 | 577.25  | 105.626307 | 0.00309025 | 0.05293153 |
| TRS | 154.25  | 182.540178 | 262.75  | 127.917617 | 0.38043442 | 1          |
| BST | 1766.25 | 305.473812 | 1788.75 | 845.370678 | 0.95588252 | 1          |
| VAL | 114     | 112.519628 | 192     | 175.402395 | 0.33793644 | 0.99799456 |
| VM  | 279.75  | 18.1176709 | 265.25  | 142.120547 | 0.82228646 | 1          |
| VP  | 184     | 185.854782 | 177.75  | 114.796559 | 0.93890976 | 1          |
| SPF | 515.25  | 72.4310016 | 518     | 138.984412 | 0.96610753 | 1          |
| MG  | 785.75  | 150.648321 | 788.5   | 378.314243 | 0.98680155 | 1          |
| LGd | 103     | 112.679486 | 55.25   | 11.8427193 | 0.14238482 | 0.67212363 |
| LP  | 400.25  | 453.129397 | 277.5   | 56.7597275 | 0.43269047 | 1          |
| PO  | 205     | 271.682413 | 106.5   | 51.6946161 | 0.23342507 | 0.83651208 |
| POL | 114.25  | 17.0171482 | 126.5   | 46.7083147 | 0.53821854 | 1          |
| AV  | 352     | 390.560281 | 692.25  | 534.66025  | 0.26369659 | 0.89092653 |
| AM  | 592.25  | 419.338666 | 756.75  | 452.259789 | 0.57840833 | 1          |
| AD  | 161     | 185.817114 | 272     | 109.69959  | 0.35633741 | 1          |
| LD  | 126     | 91.6587875 | 171.25  | 80.4751514 | 0.4368459  | 1          |
| IMD | 304     | 179.244712 | 308     | 67.6214956 | 0.96288123 | 1          |
| MD  | 660.75  | 418.517523 | 885.25  | 220.283719 | 0.35233694 | 1          |
| SMT | 21.75   | 13.4008706 | 40.25   | 33.1197323 | 0.20602717 | 0.7892223  |
| PVT | 2051.25 | 896.739046 | 2448.25 | 263.596124 | 0.38897174 | 1          |
| PT  | 458     | 220.215046 | 585.25  | 197.292296 | 0.34093556 | 1          |
| RE  | 1503.5  | 546.468968 | 1219.5  | 522.563234 | 0.43931411 | 1          |
| CM  | 447.75  | 118.015183 | 447     | 131.929274 | 0.99240185 | 1          |
| PCN | 48      | 36.4508802 | 63.25   | 38.7416658 | 0.52625516 | 1          |
| CL  | 138.25  | 114.59603  | 160.25  | 49.614346  | 0.73178738 | 1          |
| PF  | 294.75  | 234.362077 | 342     | 136.342705 | 0.72124626 | 1          |
| RT  | 539     | 202.808613 | 393     | 129.282636 | 0.14065112 | 0.66950901 |
| LGv | 671.75  | 81.6797609 | 686     | 150.890689 | 0.85185968 | 1          |
| MH  | 99.25   | 35.0273703 | 144.75  | 48.1412851 | 0.10495892 | 0.58262641 |
| LH  | 247.25  | 132.77142  | 288.25  | 79.5628682 | 0.56701022 | 1          |
| PVH | 744.75  | 175.262422 | 644.75  | 212.503137 | 0.44481552 | 1          |

|      |         |            |         |            |            |            |
|------|---------|------------|---------|------------|------------|------------|
| ARH  | 89.75   | 12.3119183 | 97      | 53.4290807 | 0.77934917 | 1          |
| DMH  | 922     | 227.190082 | 693.5   | 209.880125 | 0.11077879 | 0.60661487 |
| MEPO | 83.25   | 22.0056811 | 79.5    | 38.7685439 | 0.86500543 | 1          |
| MPO  | 1017.5  | 176.299934 | 682     | 142.05398  | 0.00087888 | 0.02232759 |
| PVp  | 157.5   | 53.2697538 | 102.75  | 47.0416482 | 0.111932   | 0.60665249 |
| SBPV | 187.5   | 22.4276615 | 132.5   | 27.9821372 | 0.00059798 | 0.01707085 |
| SCH  | 32.5    | 12.2338329 | 21.75   | 8.69386757 | 0.10507286 | 0.58262641 |
| AHN  | 1298.5  | 161.50645  | 889.5   | 59.1072472 | 1.47E-09   | 2.93E-07   |
| MBO  | 919     | 121.81133  | 691.5   | 244.601036 | 0.07097627 | 0.47507918 |
| MPN  | 224.75  | 38.6382798 | 172.25  | 37.4377261 | 0.02864844 | 0.26018094 |
| VMH  | 161.5   | 33.1511689 | 146.25  | 47.6261483 | 0.57004251 | 1          |
| PH   | 2010    | 240.570156 | 1528.5  | 238.087519 | 0.00155437 | 0.03328014 |
| LHA  | 6075.5  | 572.94706  | 4343.75 | 78.8601082 | 2.02E-15   | 1.21E-12   |
| LPO  | 1060    | 236.455775 | 636.25  | 106.881165 | 3.14E-05   | 0.0022162  |
| RCH  | 103.25  | 37.9857429 | 69.25   | 26.1326743 | 0.0834592  | 0.50335405 |
| STN  | 418.25  | 67.5394946 | 316.75  | 40.5246838 | 0.00237906 | 0.04527774 |
| TU   | 307.25  | 68.4367104 | 198.25  | 62.3665241 | 0.00776885 | 0.09806855 |
| ZI   | 2745.75 | 433.43925  | 2165.5  | 445.304765 | 0.03886035 | 0.3258291  |
| SCs  | 5552.75 | 963.354685 | 4338.75 | 1109.45674 | 0.05834102 | 0.4317956  |
| IC   | 8121    | 2181.89871 | 7245.75 | 783.229798 | 0.34457464 | 1          |
| SNr  | 1506.5  | 614.419238 | 716.25  | 163.128528 | 0.00022185 | 0.00859915 |
| VTA  | 1233    | 298.937006 | 844.25  | 209.463402 | 0.01140145 | 0.12896544 |
| RR   | 977     | 482.340129 | 922.5   | 148.706646 | 0.79091902 | 1          |
| MRN  | 4564.25 | 1032.19616 | 5603.5  | 1900.06342 | 0.23652276 | 0.839026   |
| SCm  | 7331    | 952.152299 | 8495.75 | 1356.15815 | 0.09407589 | 0.54001546 |
| PAG  | 4143.25 | 569.651575 | 5318.75 | 946.121689 | 0.00785651 | 0.09812458 |
| CUN  | 197.5   | 57.2625532 | 221     | 67.8331286 | 0.53220721 | 1          |
| RN   | 176     | 42.4735212 | 177     | 73.0524925 | 0.97773488 | 1          |
| SNc  | 571.75  | 187.297224 | 361     | 24.0416306 | 0.00091366 | 0.02235674 |
| PPN  | 536     | 171.388448 | 564.75  | 98.996212  | 0.7518104  | 1          |
| RAmb | 1009.25 | 209.281907 | 849.5   | 95.3886786 | 0.07982648 | 0.49083053 |
| NLL  | 912.5   | 222.982062 | 742.5   | 107.059174 | 0.09198063 | 0.53797454 |
| PSV  | 599.75  | 36.6731055 | 511     | 77.9786296 | 0.02236944 | 0.21986427 |
| PB   | 722     | 260.435533 | 717.25  | 208.655018 | 0.97335098 | 1          |
| SOC  | 369.5   | 91.7769034 | 391.75  | 104.948797 | 0.7152767  | 1          |
| B    | 36.5    | 26.4007576 | 67.75   | 26.0816027 | 0.06562305 | 0.46012885 |
| PCG  | 669.25  | 345.709295 | 974.75  | 320.389737 | 0.1167912  | 0.6141783  |
| PG   | 3352.75 | 191.102721 | 2994.25 | 509.616441 | 0.16537059 | 0.71323501 |
| PRNc | 1195    | 329.24459  | 1117.75 | 226.11999  | 0.65902196 | 1          |

|      |        |            |         |            |            |            |
|------|--------|------------|---------|------------|------------|------------|
| SUT  | 125.25 | 89.9865731 | 60      | 35.2041664 | 0.06835258 | 0.46565198 |
| TRN  | 2259   | 320.609836 | 2027.75 | 177.118369 | 0.13814973 | 0.66317109 |
| V    | 218.75 | 90.0902325 | 171     | 44.2944692 | 0.26576754 | 0.89092653 |
| CS   | 698.75 | 326.305966 | 589.75  | 88.658051  | 0.40341985 | 1          |
| LC   | 71.5   | 26.4133804 | 91.25   | 41.8678476 | 0.305915   | 0.94049253 |
| LDT  | 129.75 | 113.793307 | 163     | 44.0681291 | 0.53475862 | 1          |
| NI   | 169    | 87.5861481 | 189.25  | 92.3882207 | 0.7047483  | 1          |
| PRNr | 2518.5 | 461.991703 | 1937    | 311.394712 | 0.0171586  | 0.17735484 |
